# Supplementary material for: Selective hydrodeoxygenation of 5-hydroxy-2(5H)-furanone to γ-butyrolactone over Pt/mesoporous solid acid bifunctional catalyst
Source: Royal Society of Chemistry journal article supplement (doi:10.1039/c7ra03205f), 2017-01-01
Supplement: c7ra03205f1.pdf [file c7ra03205f1.pdf]

## Supporting Information

### Selective Hydrodeoxygenation of 5-hydroxy-2(5H)-furanone to $\gamma$ -butyrolactone over Pt/mesoporous solid acid bifunctional catalyst

Bingfeng Chen, Fengbo Li\*, Guoqing Yuan\*

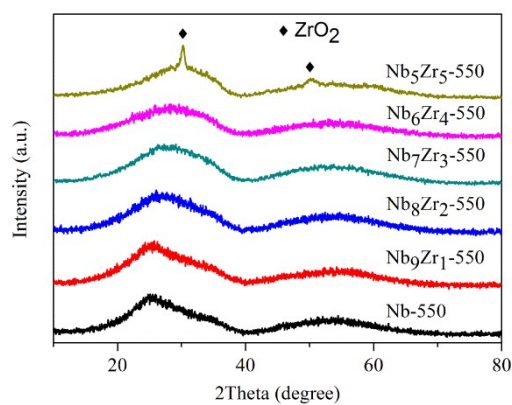

Fig. S1 Wide-angle XRD patterns of Nb<sub>10-x</sub>Zr<sub>x</sub>-550 samples with different ratio of niobium to zirconium.

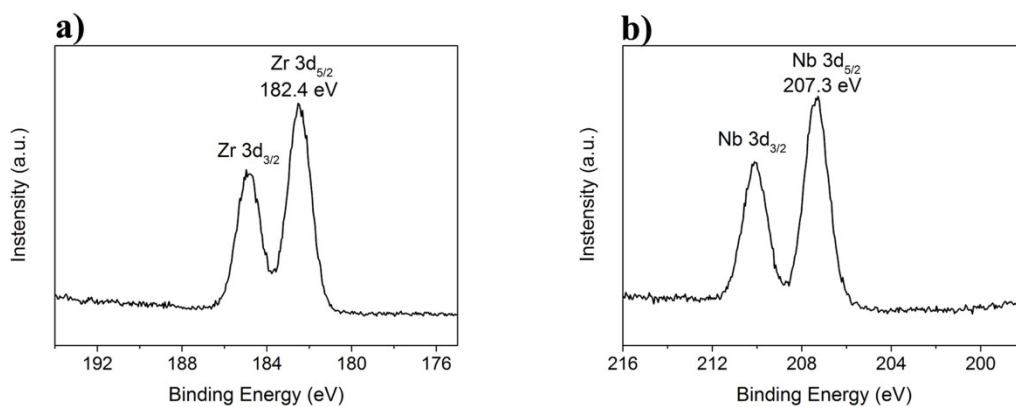

Fig. S2 High resolution of XPS spectra of Zr 3d (a) and Nb 3d (b).

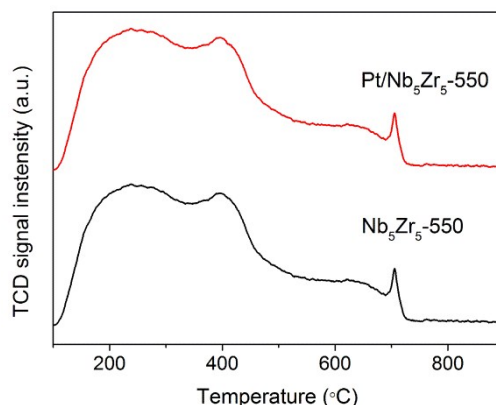

Fig. S3 NH<sub>3</sub>-TPD curves of Nb<sub>5</sub>Zr<sub>5</sub>-550 and Pt/Nb<sub>5</sub>Zr<sub>5</sub>-550.

Table S1 Typical catalytic processes for GBL production from furfural derivatives.

| Entry | Catalysts and Reaction conditions                                                                                                                                                  | Typical Substrates                                                                  | Target compound (yield %)                                                                                                                                                                     | References                                                       |
|-------|------------------------------------------------------------------------------------------------------------------------------------------------------------------------------------|-------------------------------------------------------------------------------------|-----------------------------------------------------------------------------------------------------------------------------------------------------------------------------------------------|------------------------------------------------------------------|
| 1     | Homogeneous catalyst<br>0.5 mol% CoCl <sub>2</sub> , 1 atm O <sub>2</sub> , 40 °C/ 48 h.                                                                                           |   | <br>(34)                                                                                                    | P. Li, H. Alper, J. Mol. Catal., 1992, 72, 143-152.              |
| 2     | Homogeneous catalyst<br>1 mol% palladium dimer [ Pd( PBU <sub>t</sub> <sup>2</sup> H) (μ-PBU <sub>t</sub> <sup>2</sup> ) ] <sub>2</sub> , 1 atm O <sub>2</sub> , 50 °C/ 24 h.      |  | <br>(7.5)                                                                                                  | M. Sommovigo, H. Alper, J. Mol. Catal., 1994, 88, 151-158.       |
| 3     | Homogeneous catalyst<br>0.7 mol%, [Cu(R <sub>2</sub> [16]aneN <sub>6</sub> )](ClO <sub>4</sub> ) <sub>2</sub> , 0.05 mol THF, 0.05 mol H <sub>2</sub> O <sub>2</sub> , reflux/ 4 h |  | <br>(99.9)                                                                                                 | M. Salavati-Niasari, Inorg. Chem. Commun., 2006, 9, 628-633.     |
| 4     | Heterogeneous catalyst<br>[Cu(R <sub>2</sub> [14]-aneN <sub>6</sub> )] <sup>2+</sup> -NaY<br>0.05 mol THF, 0.05 mol H <sub>2</sub> O <sub>2</sub> , reflux/ 4 h                    |  |  (17.3)<br>)<br> (80.6) | M. Salavati-Niasari, Inorg. Chem. Commun., 2006, 9, 628-633.     |
| 5     | Homogeneous catalyst<br>equivalent NaBrO <sub>3</sub> and KHSO <sub>4</sub> , 25–30 °C/16 h                                                                                        |  |  (80.0)<br>)                                                                                               | L. Metsger, S. Bittner, Tetrahedron, 2000, 56, 1905-1910.        |
| 6     | Heterogeneous catalyst<br>2.8 wt% iron-containing clay 0.05 mol THF, 0.05 mol H <sub>2</sub> O <sub>2</sub> , 66 °C/4 h.                                                           |  |  (16.6)<br>)                                                                                               | A. Ausavasukhia, T. Sooknoi, Green Chem., 2015, 17, 435-441.     |
| 7     | Heterogeneous catalyst<br>10 wt% Pd/SiO <sub>2</sub> , 2(5H)-furanone (6.0 g), methanol (100 mL), 353 K, 3.5 MPa H <sub>2</sub> .                                                  |  |  (92.6)<br>)                                                                                               | X. D. Li, X. C. Lan, T. F. Wang, Green Chem., 2016, 18, 638-642. |
